## References

- 1 Benson GS: Peyronie's disease (editorial). *J Urol* 1993;149:1326.
- 2 Nyberg LM, Bias WB, Hochberg MC, Walsh PC: Identification of an inherited form of Peyronie's disease with autosomal dominant inheritance and association with Dupuytren's contracture in histocompatibility B7 cross-reacting antigens. *J Urol* 1982;128:48-51.
- 3 Gelbard MK, Dorey F, James K: The natural history of Peyronie's disease. *J Urol* 1990;144:1376-1379.
- 4 Penson DF, Seftel AD, Krane RJ, Frohrib D, Goldstein I: The hemodynamic pathophysiology of impotence following blunt trauma to the erect penis. *J Urol* 1992;148:1171-1180.
- 5 O'Donnel PD: Results of surgical management of Peyronie's disease. *J Urol* 1992;148:1184-1187.
- 6 Nesbit RM: Congenital curvature of the phallus: Report of three cases with description of corrective operation. *Trans Am Ass Genitourin Surg* 1964;56:20-22.
- 7 Das S: Peyronie's disease: Excision and autografting with tunica vaginalis. *J Urol* 1980;123:818-819.
- 8 Gelbard MK, Hayden B: Expanding contractions of the tunica albuginea due to Peyronie's disease with temporalis fascia free grafts. *J Urol* 1991;145:772-776.
- 9 Brock G, Nunes L, Von Heyden B, Martinez-Pineiro L, Geng LH, Lue TF: Can a venous patch graft be a substitute for the tunica albuginea of the penis? *J Urol* 1993;150:1306-1309.
- 10 Mulchay JJ, Rowland RG: Tunica wedge excision to correct penile curvature associated with the inflatable penile prostheses. *J Urol* 1987;138:63-64.
- 11 Fournier GR, Lue TF, Tanagho EA: Peyronie's plaque: Surgical treatment with the carbon-dioxide laser and a deep dorsal vein patch graft. *J Urol* 1993;149:1321-1325.
- 12 Knoll LD, Furlow WL, Benson RC Jr: Management of Peyronie's disease by implantation of inflatable penile prostheses. *Urol* 1990;36:406-409.
- 13 Montorsi F, Guazzoni G, Bergamaschi F, Rigatti P: Patient-partner satisfaction with semi-rigid penile prostheses for Peyronie's disease: A 5-year follow-up study. *J Urol* 1993;150:1819-1821.

## Announcement

### Heinrich Warner Stiftung

Submission of the Heinrich Warner Prize 1997

- (1) The Heinrich Warner Prize is granted every 2 years. The endowment of the submission for 1997 will be: DEM 30,000.00. The prize is awarded in recognition of outstanding scientific clinical or experimental research in the field of urological oncology which has not yet been published.
- (2) The prize winner will be invited to present his paper at the Symposium of the Heinrich Warner Stiftung held every 2 years in Hamburg (Germany). A summary will be published together with the summaries of the other presentations at the Symposium.
- (3) Applications should be made in English or German language. The Board of the Foundation has no objection that the work be published after having been sent to the Heinrich Warner Stiftung even if it was published before the prize had been awarded. Several authors can jointly participate.
- (4) The paper has to be forwarded anonymously (four copies) together with a letter until August 1, 1997 - mentioning the author, his address, and profession - and be addressed to:

Heinrich Warner Stiftung  
c/o Luther & Partner  
Attn. Mr. Rüdiger Ludwig  
Hermannstrasse 46  
D-20095 Hamburg (Germany)
